# Supplementary material for: Characteristics of Fe/C catalysts based on pyrolysis of ferric citrate and its peroxymonosulfate activation performance to degrade sulfadiazine in water
Source: Royal Society of Chemistry journal article supplement (doi:10.1039/d4ra00768a), 2024-01-01
Supplement: d4ra00768a1.pdf [file d4ra00768a1.pdf]

## Supplementary data

Manuscript ID: RA-ART-01-2024-000768.R1

TITLE: Characteristics of Fe/C catalysts based on pyrolysis of ferric citrate and its activation performance for peroxymonosulfate to degrade sulfadiazine in water

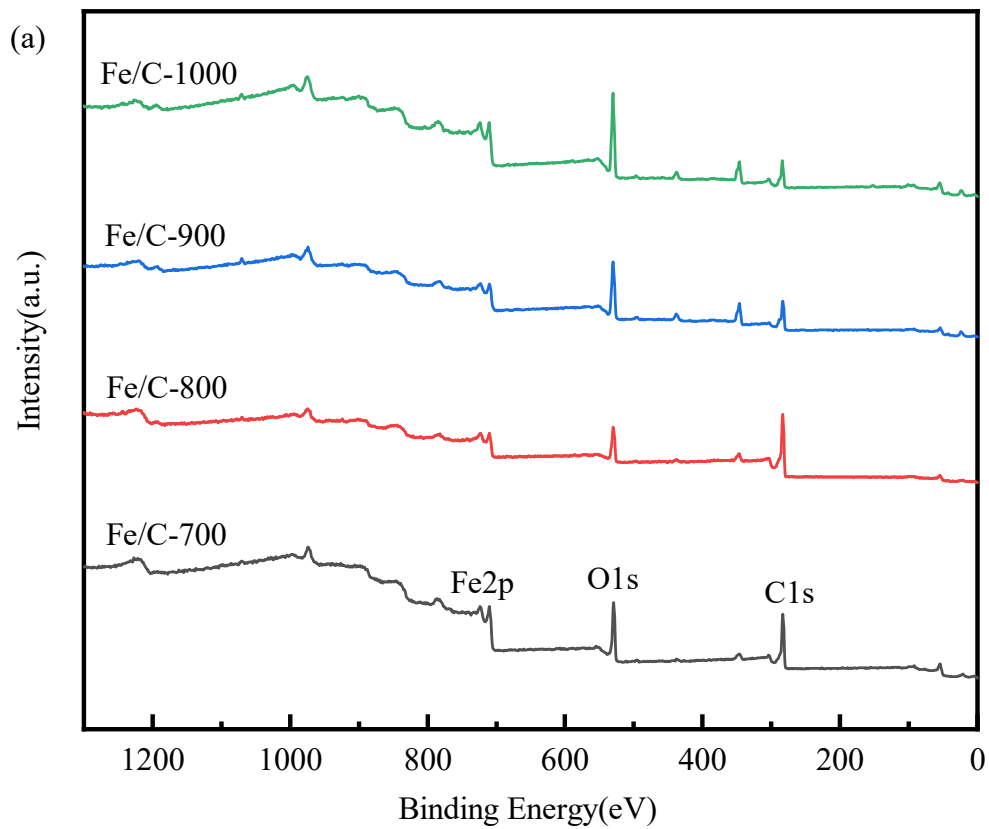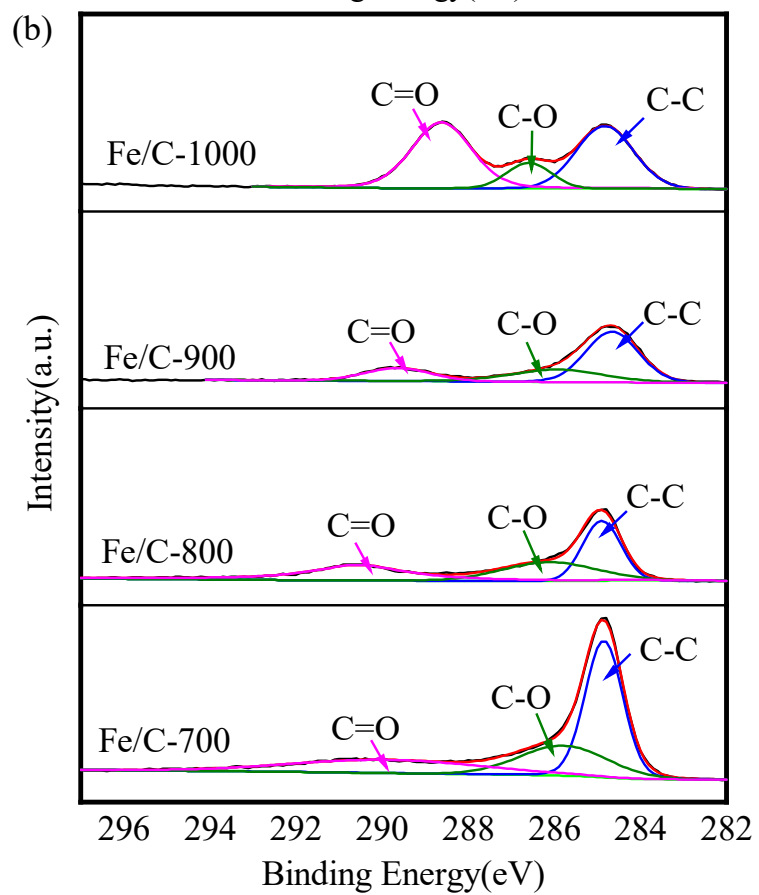

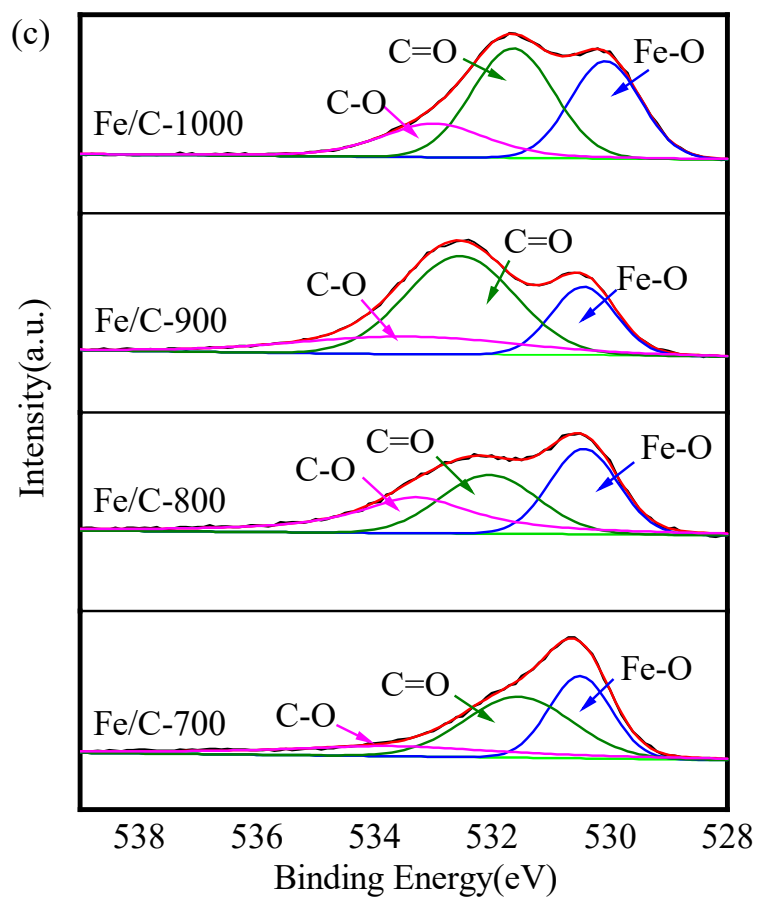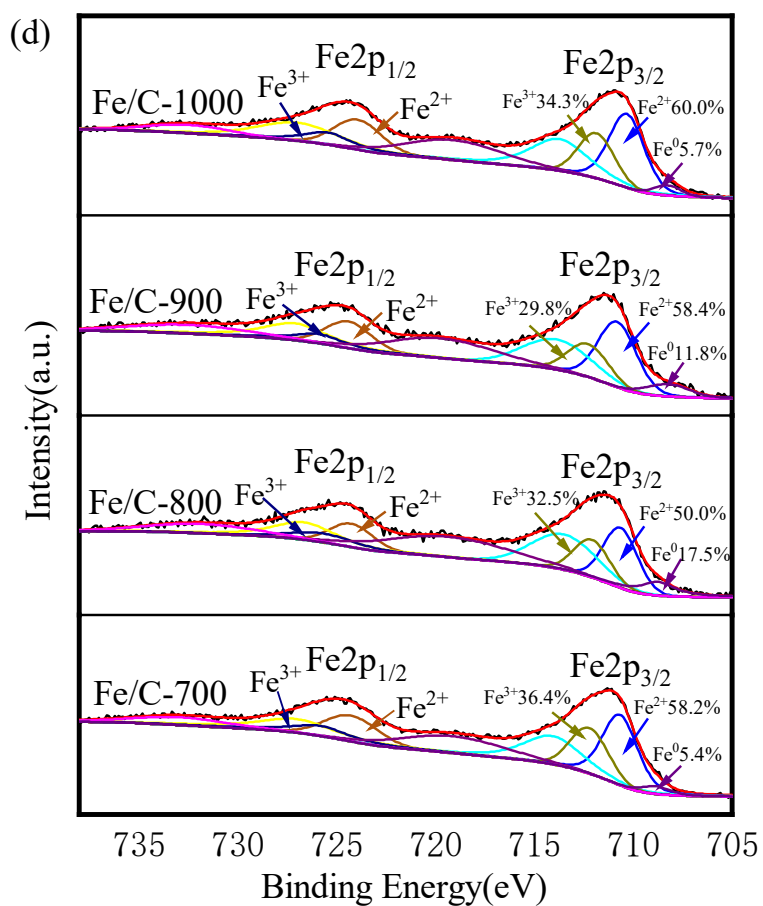

Fig. S1 XPS patterns of Fe/C catalysts: wide scan(a); C1s(b); O1s(c); and Fe2p(d)
